# Supplementary material for: Designing high affinity target-binding peptides to HLA-E: a key membrane antigen of multiple myeloma
Source: PubMed Central journal article supplement (PMC7655190; doi:10.18632/aging.103858), 2020-10-28
Supplement: aging-12-103858-s001..pdf [file aging-12-103858-s001..pdf]

## SUPPLEMENTARY FIGURE

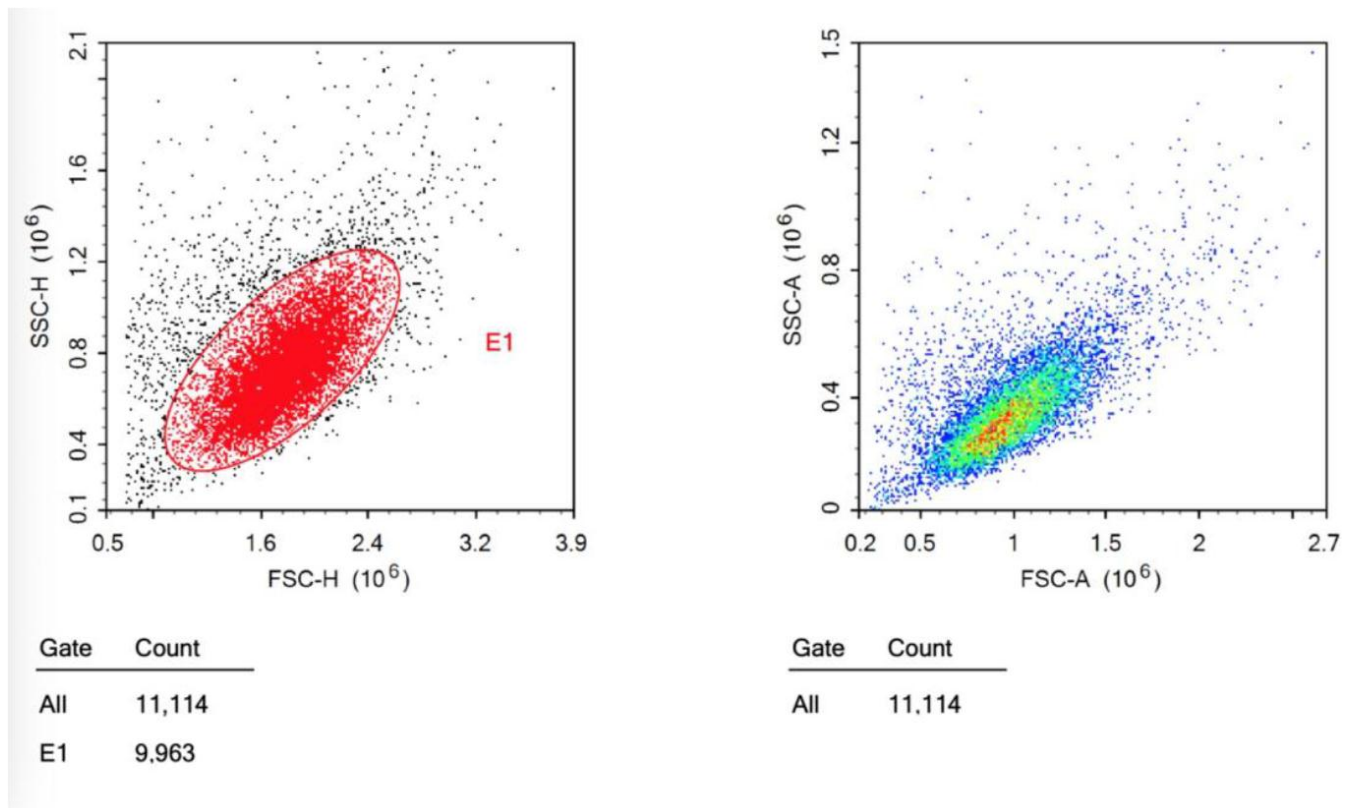

**Supplementary Figure 1. The way to circle cells.** First, a 'live gate' was circled. Cells were first gated by their FSC/SSC properties and then, the percentage of each concentration FITC-labeled peptides were computed.
